# Supplementary material
Source: PubMed Central journal article supplement (PMC3285315)
Supplement: supp_M111.308486_jbc.M111.308486-1.pdf [file supp_M111.308486_jbc.M111.308486-1.pdf]

## Supplemental data

### GENERAL MATERIALS AND PROCEDURE FOR SYNTHESIS OF GalNAc/GlcNAc-PP-LIPID

All solvents were dried with a solvent-purification system from Innovative Technology, Inc. All reagents were obtained from commercial sources and used without further purification. The 200-400 mesh silica gel 60 RP-18 was utilized for purification.  $^1\text{H}$ ,  $^{13}\text{C}$  and  $^{31}\text{P}$  NMR spectra were recorded at the indicated field strengths. Mass spectral data was collected using a Shimadzu LCMS-2010A Liquid Chromatography Mass Spectrometer or a Bruker micrOTOF Instrument.

The general procedure for chemical synthesis of GalNAc/GlcNAc-PP-lipid compounds is shown as Fig. S1. Specifically, the N,N'-Carbonyldiimidazole (CDI) (23 mg, 0.14 mmol) was added to a reaction vessel containing the diisopropylethylammonium salt of GalNAc/GlcNAc-1- $\text{PO}_4^{2-}$  (23 mg, 0.034 mmol). The vessel was flushed with argon, after which anhydrous THF was added (3 mL). The reaction was stirred at room temperature for 2 h. Addition of dry  $\text{CH}_3\text{OH}$  (42  $\mu\text{L}$ ) followed by stirring for an additional 1 h at room temperature served to remove excess CDI. The reaction mixture was concentrated and then anhydrous THF (3 mL) was once again added. To a separate reaction vessel, lipid phosphate (0.026 mmol) was added, and the vessel was then flushed with argon. The activated GalNAc/GlcNAc-1- $\text{PO}_4^{2-}$  was transferred into this vessel via syringe. The reaction was stirred at room temperature for 3 days, after which the reaction mixture was concentrated. Dissolution of the residue in water, followed by filtration through a short bed of C-18 reverse phase silica gel (water then 1:1 Water/Isopropanol) afforded the crude product.

The crude product was treated with a 0.1%  $\text{NaOCH}_3$  in  $\text{CH}_3\text{OH}$  solution (3 mL). The reaction was stirred at room temperature for 40 min. The reaction mixture was neutralized with Amberlyst-15 ion exchange resin until pH around 7 and then concentrated, after which the residue was dissolved in water. Purification via C-18 reverse phase column chromatography (Solvent A: Isopropanol (Lipids: Undecaprenyl, Solanesyl,) or  $\text{CH}_3\text{CN}$  (Lipids: Heptaprenyl, Pentaprenyl, MS-Pentaprenyl, cis-Farnesyl, Undecyl, Geranyl); Solvent B = 1.7%  $\text{NH}_4\text{HCO}_3$ ; A/B = 0%, 5%, 10%, 15%, 20%, 25%, 30%, 35%, 40%, 45% and 50% (10 mL each)) provided GalNAc/GlcNAc-PP-lipid as a white solid following lyophilization.

### SYNTHESIS AND CHARACTERIZATION OF EACH OF GalNAc/GlcNAc-PP-LIPID COMPOUNDS

Chemical synthesis and characterization of some GalNAc/GlcNAc-PP-lipid compounds have been reported in our previously published paper (Woodward R, *et al.* (2010) *In vitro*

bacterial polysaccharide biosynthesis: defining the functions of Wzy and Wzz. *Nat Chem Biol* 6:418-423.) and those data as well as the data for the newly-synthesized compounds in this study were all listed below for reference.

*Chemical synthesis of GalNAc-PP-Geranyl-GalNAc-PP-Geranyl* was prepared using the general procedure as described above. Following the deprotection step, the crude product was purified via C-18 reverse phase column chromatography to afford GalNAc-PP-Geranyl as a white solid (10 mg, 11% over two steps).  $^1\text{H}$  NMR (500 MHz,  $\text{D}_2\text{O}$ ):  $\delta$  5.57 (dd,  $J = 3.4$  Hz,  $J = 7.0$  Hz, 1H), 5.48 (td,  $J = 1.1$  Hz,  $J = 7.1$  Hz, 1H), 5.28-5.22 (m, 1H), 4.53 (t,  $J = 6.9$  Hz, 2H), 4.29 (dt,  $J = 3.0$  Hz,  $J = 10.9$  Hz, 1H), 4.23 (t,  $J = 6.2$  Hz, 1H), 4.08 (d,  $J = 2.6$  Hz, 1H), 4.01 (dd,  $J = 3.2$  Hz,  $J = 10.9$  Hz, 1H), 3.85-3.78 (m, 2H), 2.23-2.17 (m, 2H), 2.16-2.12 (m, 2H), 2.11 (s, 3H), 1.76 (s, 3H), 1.73 (s, 3H), 1.67 (s, 3H);  $^{13}\text{C}$  NMR (125 MHz,  $\text{D}_2\text{O}$ ):  $\delta$  160.3, 143.0, 133.7, 124.1, 121.6, 94.7, 72.1, 68.4, 67.8, 62.5, 61.1, 49.8, 38.8, 25.6, 24.8, 22.2, 17.0, 15.6;  $^{31}\text{P}$  NMR (162 MHz,  $\text{D}_2\text{O}$ ):  $\delta$  -10.2, -12.5; LRMS ( $m/z$ ):  $[\text{M}-\text{H}]^-$  calcd. for  $\text{C}_{18}\text{H}_{32}\text{NO}_{12}\text{P}_2$ , 516.1; found 516.1.

*Chemical synthesis of GalNAc-PP-cis-Farnesyl-GalNAc-PP-cis-Farnesyl* was prepared using the general procedure as described above. Following the deprotection step, the crude product was purified via C-18 reverse phase column chromatography to afford GalNAc-PP-cis-Farnesyl as a white solid (11 mg, 6% over two steps).  $^1\text{H}$  NMR (500 MHz,  $\text{D}_2\text{O}$ ):  $\delta$  5.58 (dd,  $J = 3.4$  Hz,  $J = 7.0$  Hz, 1H), 5.51 (t,  $J = 6.1$  Hz, 1H), 5.32-5.22 (m, 2H), 4.52 (t,  $J = 7.0$  Hz, 2H), 4.31 (dt,  $J = 3.0$  Hz,  $J = 10.9$  Hz, 1H), 4.25 (t,  $J = 6.2$  Hz, 1H), 4.09 (d,  $J = 3.0$  Hz, 1H), 4.01 (dd,  $J = 3.2$  Hz,  $J = 10.9$  Hz, 1H), 3.88-3.75 (m, 2H), 2.24-2.13 (m, 8H), 2.12 (s, 3H), 1.83 (s, 3H), 1.75 (s, 6H), 1.69 (s, 3H);  $^{13}\text{C}$  NMR (125 MHz,  $\text{D}_2\text{O}$ ):  $\delta$  175.0, 142.8, 137.2, 133.7, 124.8, 124.4, 120.5, 94.7, 72.1, 68.5, 67.9, 62.9, 61.1, 49.8, 32.1, 31.6, 31.2, 25.9, 24.9, 22.7, 22.5, 22.2, 17.0;  $^{31}\text{P}$  NMR (162 MHz,  $\text{D}_2\text{O}$ ):  $\delta$  -10.2, -12.5; LRMS ( $m/z$ ):  $[\text{M}-\text{H}]^-$  calcd. for  $\text{C}_{23}\text{H}_{40}\text{NO}_{12}\text{P}_2$ , 584.2; found 584.2.

*Chemical synthesis of GalNAc-PP-MS-Pentaprenyl-GalNAc-PP-MS-Pentaprenyl* was prepared using the general procedure as described above. Following the deprotection step, the crude product was purified via C-18 reverse phase column chromatography to afford GalNAc-PP-MS-Pentaprenyl as a white solid (27 mg from 65 mg lipid phosphate, 26% over 2 steps).  $^1\text{H}$  NMR (500 MHz,  $\text{D}_2\text{O}$ ):  $\delta$  5.55 (dd,  $J = 3.3$  Hz,  $J = 7.1$  Hz, 1H), 5.22-5.05 (m, 4H), 4.26 (dt,  $J = 2.9$  Hz,  $J = 11.0$  Hz, 1H), 4.19 (dd,  $J = 5.2$  Hz,  $J = 7.1$  Hz, 1H), 4.06-3.93 (m, 4H), 3.84-3.72 (m, 2H), 2.11-2.02 (m, 11H), 2.01-1.92 (m, 6H), 1.69 (s, 3H), 1.66 (s, 3H) 1.61 (s, 3H), 1.58 (s, 6H), 1.54-1.24 (m, 4H), 1.22-1.10 (m, 1H), 0.92 (d,  $J = 6.5$  Hz, 3H);  $^{13}\text{C}$  NMR (125 MHz,  $\text{D}_2\text{O}$ ):  $\delta$  174.5, 135.0, 134.8, 134.5, 130.8, 125.7, 124.4, 124.2, 94.7, 72.1, 68.6, 67.7, 64.9, 61.3, 49.9, 49.8, 39.6, 37.3, 37.1, 31.8, 29.0, 26.6, 26.6, 26.5, 25.4, 24.9, 23.2, 22.3, 18.8, 18.8, 17.4, 15.7, 15.7;  $^{31}\text{P}$

NMR (162 MHz, D<sub>2</sub>O):  $\delta$  -9.9, -11.8; LRMS ( $m/z$ ): [M-H]<sup>-</sup> calcd. for C<sub>33</sub>H<sub>58</sub>NO<sub>12</sub>P<sub>2</sub>, 722.3; found, 722.3.

*Chemical synthesis of GalNAc-PP-Pentaprenyl-GalNAc-PP-Pentaprenyl* was prepared using the general procedure as described above. Following the deprotection step, the crude product was purified via C-18 reverse phase column chromatography to afford GalNAc-PP-Pentaprenyl as a white solid (22 mg from 28 mg lipid phosphate, 49% over 2 steps). <sup>1</sup>H NMR (500 MHz, CD<sub>3</sub>OD):  $\delta$  5.67 (dd,  $J = 3.1$  Hz,  $J = 6.8$  Hz, 1H), 5.56 (t,  $J = 6.6$  Hz, 1H), 5.30-5.16 (m, 4H), 4.58 (t,  $J = 6.5$  Hz, 2H), 4.36 (d,  $J = 10.9$  Hz, 1H), 4.30 (dd,  $J = 6.0$  Hz, 1H), 4.14 (d,  $J = 3.0$  Hz, 1H), 4.07 (dd,  $J = 2.9$  Hz,  $J = 10.9$  Hz, 1H), 3.94-3.84 (m, 2H), 2.30-2.23 (m, 2H), 2.22-2.11 (m, 13H), 2.10-2.02 (m, 4H), 1.85 (s, 3H), 1.80 (s, 3H), 1.75 (s, 3H), 1.71 (s, 3H), 1.68 (s, 6H); <sup>13</sup>C NMR (125 MHz, D<sub>2</sub>O):  $\delta$  174.7, 160.3, 141.2, 135.8, 134.9, 134.4, 130.6, 124.6, 124.5, 124.3, 121.2, 94.7, 72.2, 68.7, 67.7, 62.7, 61.3, 49.9, 48.9, 39.7, 39.7, 32.0, 31.9, 26.7, 26.6, 26.1, 25.4, 23.1, 22.9, 22.3, 17.4, 15.8, 15.7; <sup>31</sup>P NMR (162 MHz, D<sub>2</sub>O):  $\delta$  -10.4, -13.1; LRMS ( $m/z$ ): [M-H]<sup>-</sup> calcd. for C<sub>33</sub>H<sub>56</sub>NO<sub>12</sub>P<sub>2</sub>, 720.3; found, 720.3.

*Chemical synthesis of GalNAc-PP-Heptaprenyl-GalNAc-PP-Heptaprenyl* was prepared using the general procedure as described above. Following the deprotection step, the crude product was purified via C-18 reverse phase column chromatography to afford GalNAc-PP-Heptaprenyl as a white solid (22 mg from 42 mg lipid phosphate, 36% over 2 steps). <sup>1</sup>H NMR (500 MHz, D<sub>2</sub>O):  $\delta$  5.61 (dd,  $J = 2.7$  Hz,  $J = 5.9$  Hz, 1H), 5.50 (t,  $J = 5.5$  Hz, 1H), 5.24-5.08 (m, 6H), 4.51 (t,  $J = 5.7$  Hz, 2H), 4.29 (d,  $J = 10.8$  Hz, 1H), 4.23 (t,  $J = 5.5$  Hz, 1H), 4.07 (d,  $J = 1.4$  Hz, 1H), 4.00 (dd,  $J = 2.2$  Hz,  $J = 10.7$  Hz, 1H), 3.88-3.75 (m, 2H), 2.20-1.96 (m, 27H), 1.79 (s, 3H), 1.72 (s, 3H), 1.70 (s, 3H), 1.68 (s, 3H), 1.62 (s, 3H), 1.60 (s, 9H); <sup>13</sup>C NMR (125 MHz, D<sub>2</sub>O):  $\delta$  174.5, 172.4, 172.2, 171.9, 140.8, 136.3, 135.9, 135.9, 135.9, 135.8, 132.1, 125.7, 125.7, 125.6, 125.4, 122.7, 122.6, 96.5, 70.6, 68.7, 64.0, 64.0, 62.3, 41.0, 41.0, 41.0, 40.9, 40.8, 34.5, 33.2, 30.9, 30.8, 30.7, 30.6, 30.5, 28.0, 27.9, 27.8, 27.7, 27.7, 27.7, 26.0, 24.0, 23.8, 23.0, 20.8, 20.7, 20.7, 17.9, 16.8, 16.2, 15.7, 14.5; 174.7, 165.3, 134.8, 134.6, 134.3, 130.4, 125.2, 125.0, 124.8, 124.5, 124.3, 124.3, 121.2, 94.6, 72.1, 68.7, 67.7, 62.6, 61.3, 49.9, 39.7, 39.7, 32.0, 31.9, 31.9, 29.9, 29.8, 29.7, 29.5, 26.7, 26.6, 26.2, 25.4, 23.3, 23.2, 23.0, 23.0, 22.3, 17.3, 15.7; <sup>31</sup>P NMR (162 MHz, D<sub>2</sub>O):  $\delta$  -9.7, -11.4; LRMS ( $m/z$ ): [M-H]<sup>-</sup> calcd. for C<sub>43</sub>H<sub>72</sub>NO<sub>12</sub>P<sub>2</sub>, 856.5; found, 856.7.

*Chemical synthesis of GalNAc-PP-Solanesyl-GalNAc-PP-Solanesyl* was prepared using the general procedure as described above. However, the two purification steps were reversed as the final product proved too insoluble to obtain suitable spectral data. The crude product was thus purified via C-18 reverse phase column chromatography to afford Peracetylated GalNAc-PP-

Solanesyl as a white solid (35 mg from 45 mg lipid phosphate, 50%). <sup>1</sup>H NMR (500 MHz, CD<sub>3</sub>OD): δ 5.61 (dd, *J* = 3.3 Hz, *J* = 7.3 Hz, 1H), 5.43 (t, *J* = 6.6 Hz, 2H), 5.22 (dd, *J* = 3.1 Hz, *J* = 11.3 Hz, 1H), 5.14-5.04 (m, 8H), 4.59 (t, *J* = 7.0 Hz, 1H), 4.53 (t, *J* = 6.3 Hz, 3H), 4.21 (dd, *J* = 8.2 Hz, *J* = 10.8 Hz, 1H), 4.04 (dd, *J* = 5.8 Hz, *J* = 10.8 Hz, 1H), 2.11 (s, 3H), 2.10-2.02 (m, 18H), 1.99 (s, 3H), 1.99-1.94 (m, 17H), 1.90 (s, 3H), 1.69 (s, 3H), 1.65 (s, 3H), 1.59 (s, 3H), 1.58 (s, 21H); <sup>13</sup>C NMR (125 MHz, CD<sub>3</sub>OD): δ 174.5, 172.4, 172.2, 171.9, 140.8, 136.3, 135.9, 135.9, 135.9, 135.8, 132.1, 125.7, 125.7, 125.6, 125.4, 122.7, 122.6, 96.5, 70.6, 68.7, 64.0, 64.0, 62.3, 41.0, 41.0, 41.0, 40.9, 40.8, 34.5, 33.2, 30.9, 30.8, 30.7, 30.6, 30.5, 28.0, 27.9, 27.8, 27.7, 27.7, 27.7, 26.0, 24.0, 23.8, 23.0, 20.8, 20.7, 20.7, 17.9, 16.8, 16.2, 15.7, 14.5; <sup>31</sup>P NMR (162 MHz, CD<sub>3</sub>OD): δ -9.6, -12.5; LRMS (*m/z*): [M-H]<sup>-</sup> calcd. for C<sub>59</sub>H<sub>94</sub>NO<sub>15</sub>P<sub>2</sub>, 1118.6; found, 1118.5.

Final deprotection with 0.1% NaOCH<sub>3</sub> in CH<sub>3</sub>OH and filtration through a short bed of C-18 reverse phase silica gel afforded GalNAc-PP-Solanesyl (31 mg, 99%). LRMS (*m/z*): [M-H]<sup>-</sup> calcd. for C<sub>53</sub>H<sub>88</sub>NO<sub>12</sub>P<sub>2</sub>, 992.6; found 992.6.

*Chemical synthesis of GalNAc-PP-Undecaprenyl-GalNAc-PP-Undecaprenyl* was prepared using the general procedure as described above. However, the two purification steps were reversed as the final product proved too insoluble to obtain suitable spectral data. The crude product was thus purified via C-18 reverse phase column chromatography to afford Peracetylated GalNAc-PP-Undecaprenyl as a white solid (20 mg from 23 mg lipid phosphate, 59%). <sup>1</sup>H NMR (500 MHz, CD<sub>3</sub>OD): δ 5.60 (dd, *J* = 3.2 Hz, *J* = 7.3 Hz, 1H), 5.42 (t, *J* = 6.1 Hz, 2H), 5.21 (dd, *J* = 3.2 Hz, *J* = 11.3 Hz, 1H), 5.14-5.05 (m, 10H), 4.58 (t, *J* = 6.9 Hz, 1H), 4.54-4.45 (m, 3H), 4.21 (dd, *J* = 8.1 Hz, *J* = 10.9 Hz, 1H), 4.04 (dd, *J* = 5.8 Hz, *J* = 10.8 Hz, 1H), 2.10 (s, 3H), 2.08-2.00 (m, 34H), 1.98 (s, 3H), 1.97 (s, 3H), 1.96-1.92 (m, 6H), 1.89 (s, 3H), 1.71 (s, 3H), 1.66-1.62 (m, 21H), 1.58 (s, 3H), 1.57 (s, 9H); <sup>13</sup>C NMR (125 MHz, CD<sub>3</sub>OD): δ 174.4, 172.3, 172.2, 171.9, 140.6, 136.5, 136.4, 136.3, 136.3, 136.1, 135.9, 132.1, 126.3, 126.3, 126.3, 126.0, 125.6, 125.6, 125.6, 123.6, 123.6, 96.5, 70.4, 68.8, 68.7, 63.8, 63.8, 62.3, 41.0, 41.0, 40.9, 34.4, 33.4, 33.4, 33.4, 33.2, 33.0, 30.8, 30.8, 30.7, 30.6, 30.5, 30.5, 30.4, 28.0, 27.8, 27.8, 27.8, 27.7, 27.7, 27.7, 26.1, 24.0, 23.9, 23.8, 23.0, 20.8, 20.8, 20.7, 17.9, 16.3, 14.5, 14.0; <sup>31</sup>P NMR (162 MHz, CD<sub>3</sub>OD): δ -9.7, -12.6; LRMS (*m/z*): [M-H]<sup>-</sup> calcd. for C<sub>69</sub>H<sub>110</sub>NO<sub>15</sub>P<sub>2</sub>, 1254.7; found, 1254.7.

Final deprotection with 0.1% NaOCH<sub>3</sub> in CH<sub>3</sub>OH and filtration through a short bed of C-18 reverse phase silica gel afforded GalNAc-PP-Undecaprenyl (18 mg, 99%). LRMS (*m/z*): [M-H]<sup>-</sup> calcd. for C<sub>63</sub>H<sub>104</sub>NO<sub>12</sub>P<sub>2</sub>, 1128.7; found, 1128.7.

*Chemical synthesis of GlcNAc-PP-Pentaprenyl-GlcNAc-PP-Pentaprenyl* was prepared in a pure form, and directly used without any purification after deacetylation of AcGlcNAc-PP-Pentaprenyl, which was purified by C-18 reverse phase column chromatography [Solvent A:

CH<sub>3</sub>CN; Solvent B = 1.7% NH<sub>4</sub>HCO<sub>3</sub>; A/B = 0%→60% with 5% increment each time in concentration of A (10 mL each)]. Fraction containing product was lyophilized to afford pure AcGlcNAc-PP- Pentaprenyl as a white solid (14 mg from 40 mg lipid phosphate 21% yield). <sup>1</sup>H NMR (500 MHz, MeOD): δ 5.60 (br s, 1H), 5.48 (t, *J* = 6.5 Hz, 1H), 5.34 (t, *J* = 10.0 Hz, 1H), 5.17-5.09 (m, 5H), 4.56 (t, *J* = 6.5 Hz, 2H), 4.40-4.31 (m, 3H), 4.18 (dd, *J* = 1.5, 12.5 Hz, 1H), 2.16-1.97 (m, 8H), 2.07 (s, 3H), 2.01 (s, 3H), 2.00 (s, 3H), 1.97 (s, 3H), 1.76 (s, 3H), 1.70 (s, 3H), 1.68 (s, 3H), 1.63 (s, 3H), 1.61 (s, 3H); <sup>13</sup>C NMR (125 MHz, MeOD): δ 172.6, 171.1, 170.5, 169.9, 139.7, 135.2, 134.7, 134.5, 130.7, 124.4, 124.1, 121.7, 121.6, 94.5, 71.5, 68.6, 68.3, 62.6, 61.4, 39.4, 31.9, 31.6, 26.4, 26.21, 26.19, 24.5, 22.3, 21.4, 19.30, 19.26, 19.25, 16.4, 14.8; <sup>31</sup>P NMR (162 MHz, MeOD): δ -10.5, -13.4; LRMS (*m/z*): [M-H]<sup>-</sup> calcd. for C<sub>39</sub>H<sub>62</sub>NO<sub>15</sub>P<sub>2</sub>, 846.3, found 846.3.

Final deprotection with catalytic amount of 0.1% NaOCH<sub>3</sub> in CH<sub>3</sub>OH and subsequent addition of Amberlyst-15 ion exchange resin to the reaction mixture until around neutral pH (pH 7.0) afforded the GlcNAc-PP-Pentaprenyl in quantitative yield. LRMS (*m/z*): [M-H]<sup>-</sup> calcd. for C<sub>33</sub>H<sub>56</sub>NO<sub>12</sub>P<sub>2</sub>, 720.2, found 720.2.

*Chemical synthesis of GalNAc-PP-Undecyl-GalNAc-PP-Undecyl* was prepared in a pure form, and directly used without any purification after deacetylation of AcGalNAc-PP-Undecyl, which was purified by C-18 reverse phase column chromatography [Solvent A: CH<sub>3</sub>CN; Solvent B = 1.7% NH<sub>4</sub>HCO<sub>3</sub>; A/B = 0%→10% with 1% increment in concentration of A (10 mL each)]. Fraction containing product was lyophilized to afford pure AcGalNAc-PP-Undecyl as a white solid (19 mg from 30 mg lipid phosphate 30% yield). <sup>1</sup>H NMR (500 MHz, MeOD): δ 7.58 (s, 1H), 5.67-5.65 (m, 1H), 5.46 (d, *J* = 3.0 Hz, 1H), 5.24 (dd, *J* = 3.5, 11.0 Hz, 1H), 4.61-4.55 (m, 2H), 4.23 (dd, *J* = 3.0, 11.0 Hz, 1H), 4.09-4.06 (m, 1H), 4.03-3.99 (m, 2H), 2.15 (s, 3H), 2.023 (s, 3H), 2.021 (s, 3H), 1.95 (s, 3H), 1.70-1.64 (m, 2H), 1.41-1.31 (m, 16H), 0.92 (t, *J* = 7.0 Hz, 3H); <sup>13</sup>C NMR (125 MHz, MeOD): δ 172.8, 170.8, 170.7, 170.5, 119.0, 95.1(d, *J* = 5.0 Hz), 68.8, 67.3, 67.2, 66.2, 66.1, 60.8, 31.7, 30.4, 30.3, 29.4, 29.12, 29.07, 25.5, 22.3, 21.5, 19.3, 19.22, 19.18, 13.0; <sup>31</sup>P NMR (162 MHz, MeOD): δ -10.4 (d, *J* = 16.7 Hz), -13.2 (d, *J* = 16.2 Hz); LRMS (*m/z*): [M-H]<sup>-</sup> calcd. for C<sub>25</sub>H<sub>45</sub>NO<sub>15</sub>P<sub>2</sub>, 660.5; found, 660.5.

Final deprotection with catalytic amount of 0.1% NaOCH<sub>3</sub> in CH<sub>3</sub>OH and subsequent addition of Amberlyst-15 ion exchange resin to the reaction mixture until around neutral pH (pH 7.0) afforded the GalNAc-PP-Undecyl in quantitative yield. LRMS (*m/z*): [M-H]<sup>-</sup> calcd. for C<sub>19</sub>H<sub>38</sub>NO<sub>12</sub>P<sub>2</sub>, 534.2; found 534.2.

## ESI-MS ANALYSIS OF O-UNIT-PP-SUBSTRATES

Following the chemical synthesis of GalNAc-PP-lipid compounds, four glycosyl residues are successively ligated at the non-reducing end by well-characterized glycosyltransferases (WbnH, WbnJ, WbnK and WbnI), allowing for the synthesis of various lipids appended with the same oligosaccharide glycan moiety. ESI-MS was used to monitor the reaction for each of the enzymatic glycosylation steps. The ESI-MS spectra for all of the O-unit-PP-lipid substrates are shown in Fig. S2.



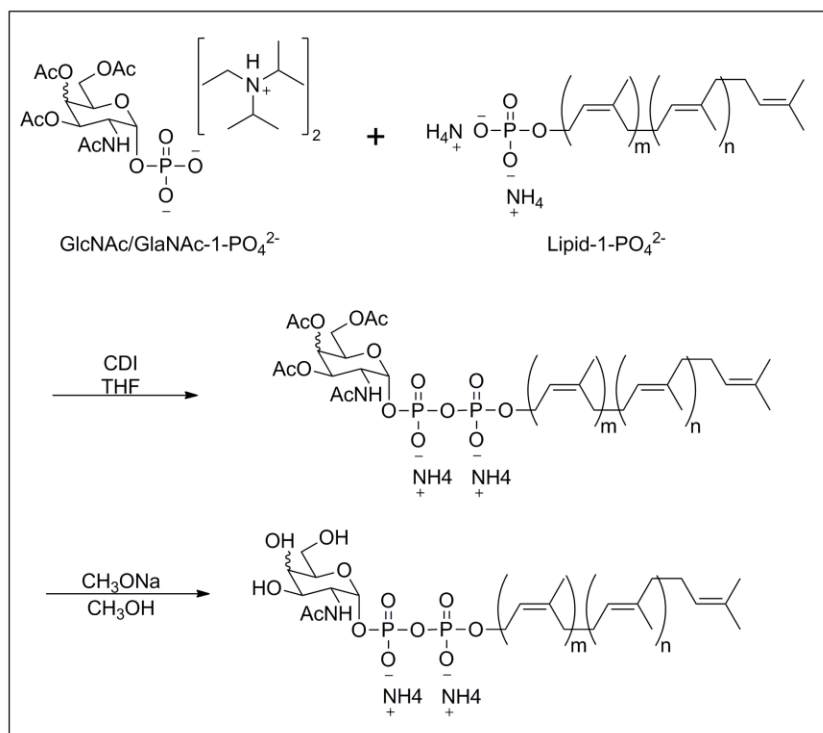

**Fig. S1.** The general scheme for chemical synthesis of GalNAc/GlcNAc-pp-lipid compounds.



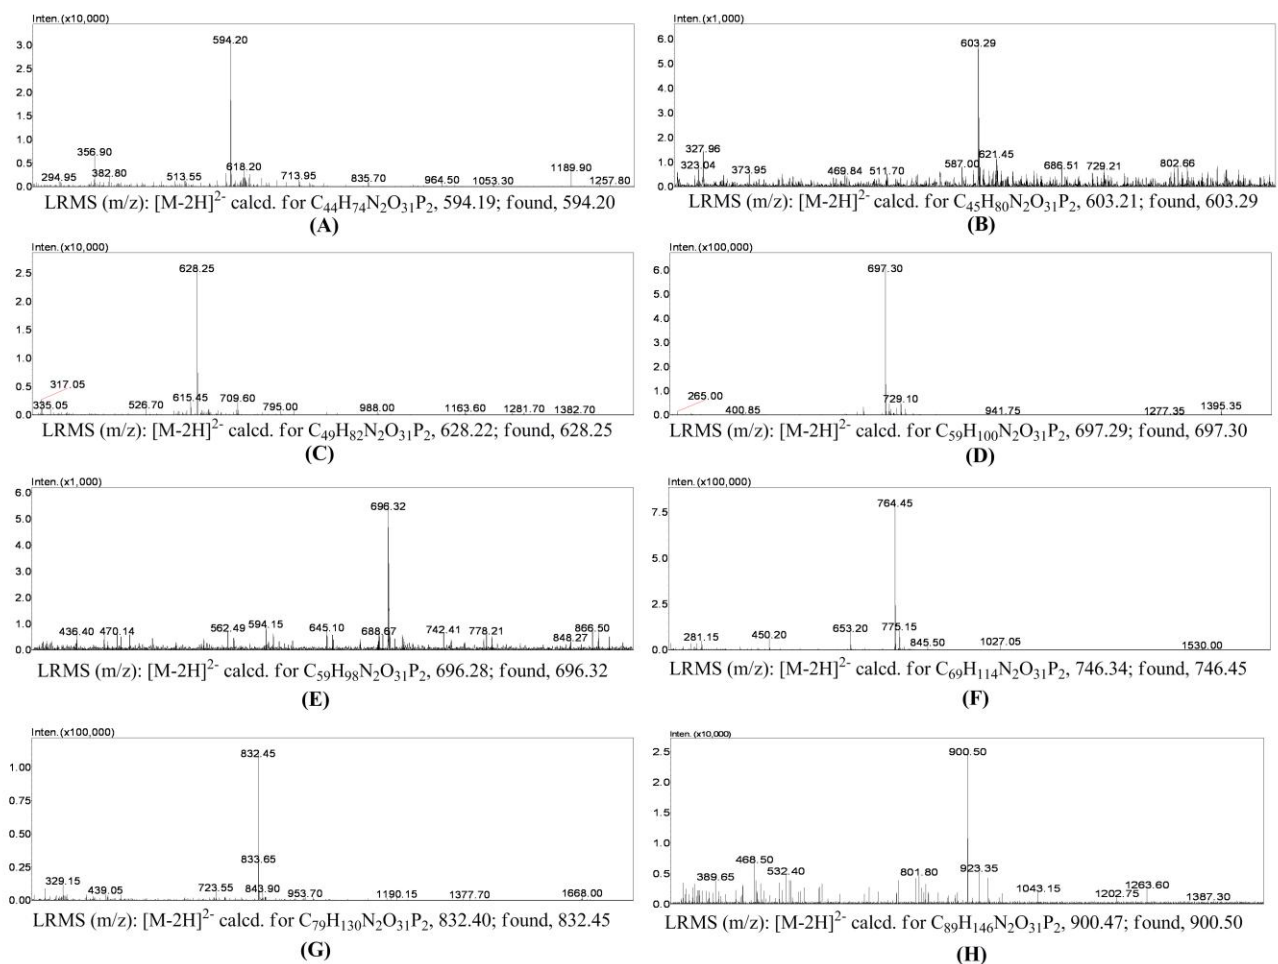

**Fig. S2.** ESI-MS spectra for all of eight O-unit-PP-lipid substrates. *A*, O-unit-PP-Geranyl. *B*, O-unit-PP-Undecyl. *C*, O-unit-PP-cis-Farnesyl. *D*, O-unit-PP-MS-Pentaprenyl. *E*, O-unit-PP-Pentaprenyl. *F*, O-unit-PP-Heptaprenyl. *G*, O-unit-PP-Solanesyl. *H*, O-unit-PP-Undecaprenyl.

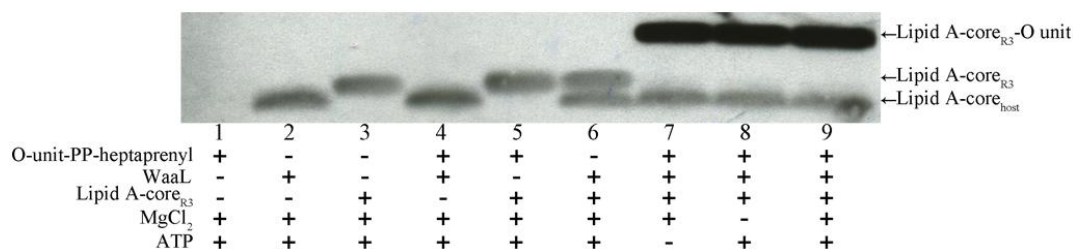

**Fig. S3.** Western blotting analyses of *in vitro* ligation reaction samples using O-unit-PP-Heptaprenyl donor.

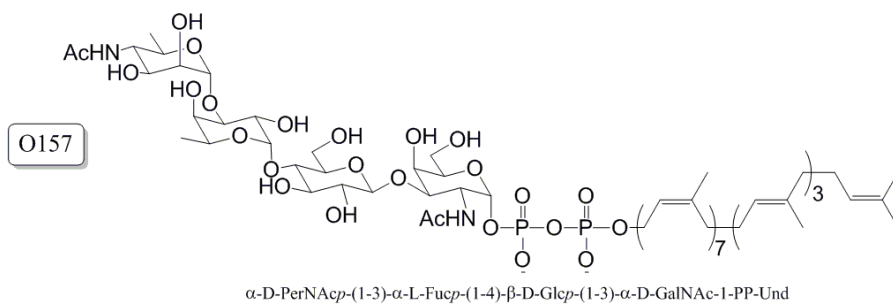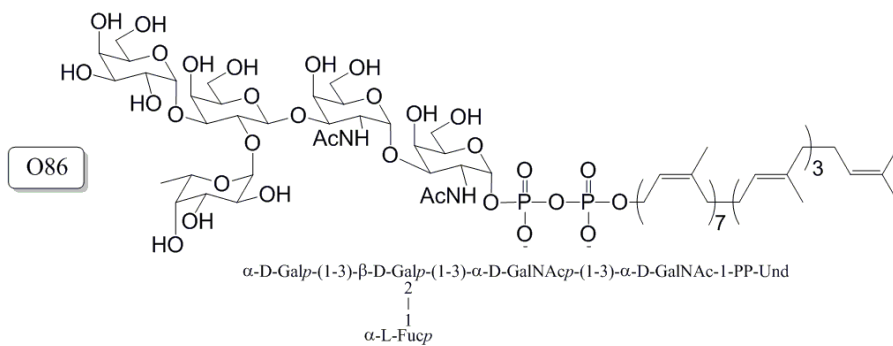

**Fig. S4.** Structures of O-units of *E. coli* O157 and O86

Vc\_AAL76923 LSFGLSF---TQTRFKYLYL-----LSVVAATVATILTLTRGAILTLFVFP--ILFF--IVNVRKIKFKQTLV--FTL 217  
Te\_ADU91200 GSLLSLFHLHGLKN-KKIFIGL---GILGFVMGIFASILSGSRGGWYVPMGF--VLVS--LFTPKSLKHSLLLIFSSVF 229  
Hp\_EGC72795 FSVFVIAFHLLDVNKYKQLVAL---VILFGIFCVLASSLSPARGGWIGVPII---LLIL--IFLYRHLSKLLGGITF 233  
As\_YP\_001140043 LN---WVFPQQRQLLRWIRYG---ALVALVAALFALYLSQSRGGWLAGGI---VGYV--ICYKALFKPKWYIA--IAM 226  
Vc\_AAL77359 LVLSICIYLLLNLSQSKVLLKLLAS---IGCVLSLAAIIMTDVFGVILFPLV---IYIL--VITIKLRWYKVAL--TSL 226  
Pd\_ZP\_06156631 ATMSLSFALASTDKRVKVIIT---VCFSPFSCALAIIGESRGLWLALALT---LFTFAIYSMIRFYQPKYWL---IMG 218  
Br\_CBW75858 LAFASL-----ERDRKIWLGEWALKI IALLCGCYASYLSGARGAWIALPVL---VWAS--MAGRHWLSNRWATA--GLV 233  
Ec\_AAC69671 PSLLASILILKSDFRHKTTLTYT---INFMLSLCAVIVTETRAAAILVFPFF---ALIL--IVMDSYINKRINYKL--YCF 242  
Ec\_AAC69682 TTLVSSIVFIKMKSKYKWLFLY---ANFALSFAAVMMGTAAIFTFPLM---IMVI--LFLQHRDQKVFPLFKG--LSG 245  
Pa\_CAG73082 IGALSAQALLKLD SAYKYLYL---GHFLVLTIAIFLTETRAAIFVYPIV---GATI--LLESEVRHNKRLFIKA--LIG 255  
Cy\_ZP\_06355745. IALLASQAIINLRHRTVSLYL---LHFLLSLAVIITTTQTRAAAILVYVPV---SIGL--FLIHYRHNRAMLLKA--LLA 252  
Ec\_AAB18599 (K12) IGIVSGVAIILYTKNHFFLFL---LNSCAVLVVALTQTTRATLLFPPII---CVAA--LIAYNKSPPKFTSS--IVL 246  
Ea\_CBA19033 ISLVMQSLMLKIRYRLGFYI---AAFILSYSAIILGTAAAMIAYPALI---LLTV--IVTKNIITVRHKIAY--ILL 236  
Ec\_AAC69648 PALLNLWLIKKTSYKIAFVIF---SAVFLFLLGLTSLRGAWLAVFIV---TLLW--LILNR--QWKLMLT--SIV 238  
Se\_AAS22256 PALLNIWLFKRTSLKLAFFAL---SAVYFLMLGLTSLRGAWLAVLVV---GVLW--AILNR--QWKLMLGIC--AAI 237  
Pm\_CAR46213 PALLNIWLFKRNKAIKLVFLV---SAYLFFILGLTSLRGAWLAVLIV---GVLW--AILNR--QWKLMLGIC--AIL 237  
Ec\_AAC69661 (R3) PALLNLWLKSAKYRISFVVL---SVIFIFLILGLTSLRGAWLSVLVI---GLIW--ILMFK--QWKLMLVG--VMV 238  
Xb\_YP\_003470214 PVLLCTWALWKKHSLLSWLLLI---IASAISLFLLLGLTSLRGAWVAIVVA---TVFI--IVINR--EWKLLIAA--TIC 242  
Pm\_CAR46213 LLLIALAALGALSTNMVQERVSALSDIRKL---VSVLLFLFAILGLTSLRGAWVALAIS---TLLI--LIINR--QWIFLTLMSGIC 240  
Pr\_EFE51464 PILPILWYLLPKSKLYFYIYL---SIVFLVLLGLTSLRGAWVAIVVA---GLLF--LCFKR--PWKLIGV--VLC 234  
Pa\_AAG08384 TALWLAGYWM---QSRPILAPL---PLISLALLGLLITATGSRTPVLGLTAA---LMWL--VLADGR---KKALIALALA 241  
Kp\_BAH65745 GILICGMLL---KEKASHWLY---LPVVIMLVMLLTQSRGPIALVAVGCTLHL---HVFTR---RNLLIAAALA 206  
Vc\_AAL77364 SIIFTLPLFLDRDSSKLFKLLF---ILFISSSMLCLLTSRGRAPILAVIS---SFIL--ILFTR---PKVLLFSFSSL 226  
Lb\_YP\_797859 PVFLFLRSLFDRNFKKAGIQG---IILLSFLVYVFLNNA---SSMLGAIFSSITAFVLGIVRKLPSAKILLFASGIL 262

\*

Vc\_AAL76923 ISFLLVSVSYQFSPRIQERVDFTIFEISSIASNNHIAAASSGGRLQLWYAAVEAFK-----HNPIWGTTYSE--RESL 288  
Te\_ADU91200 FVVVAASAYHYSPAIFKERVDMTYETLFDKLDSEIKVLDTSITARFEMWYLAASEMIK-----VHPPIGWGDVQ--YLFK 300  
Hp\_EGC72795 LCII--SVVLTVNKNFVNRLSEAQYELKLYL---SGDNKVVSSIGERLDMWTIGSKAFL-----EHPISGWSLKE--LDY 301  
As\_YP\_001140043 LCIASIGITYHTNQLVQLRVADAVSDLNFA---EKGSYSSWGLRVVAWQSAWLGFL-----DAPLTGVGTNG--FDAL 295  
Vc\_AAL77359 VTVLSGVFYATFQSDINARIAQTQDEIALI---KQGDLSSSIGIRLDLWMHCVEIIA-----QNPPLFCVGDSC--LQGS 295  
Pd\_ZP\_06156631 LVILIGSMGIVLKPQLEARWQTEQEYQAI---QNGNMCSTIGRLQMWQAASILVE---DDPILGTGDAH---IQK 286  
Br\_CBW75858 LLLIALAALGALSTNMVQERVSALSDIRKL---SAGNTSSSTIGIRLELWKALELYA-----EQPVFCVCKGR--LKEG 302  
Ec\_AAC69671 ITIALLAGVFSFKDITLLMRMNDLNDLVNY---SHDNTRTSVGARLAMYEVGLKTYL-----PI--QGSLEK--RAEK 308  
Ec\_AAC69682 VFILLACGLIFNKEIDRRINSLKADVISYA---TKNNSQSSVGARFAMVNAGIKGS-----PDGFNWQSLAQ--RAEK 314  
Pa\_CAG73082 SSATILLCLFLFQETIHQRANDLINDVHSY---SMNNSRTSVGARIAMYQSGTEAG---EBALLGQSAEQ--RSER 323  
Cy\_ZP\_06355745. FVLLVGLASIPKSIENRYQNMVLDHSY---SQNNSRTSISGARLAMQRAIEAG---KVHLWQSLAQ--RGAE 320  
Ec\_AAB18599 (K12) LIAILASIVIFNKPIQNRNEALNDLNSY---TNANSVTSLGARLAMYEIGLNIFI-----KSPFSFRSAES--RAES 315  
Ea\_CBA19033 VVLLTSTSLVFKDLVMSRIHDFERNIAI---NDIEAENSVFSRVWVQVAIRTGS---EAPL--GQSAEQ--RASE 304  
Ec\_AAC69648 ISVAAGCVFTY---KGDHAGKDRLLY---KLQNTDSSYRYTNGTQGTAWTLIM---ENPLKRGYCGDDIYHAI 302  
Se\_AAS22256 LVIAGALVITQ---QIHKPNQDRLLY---KLQNTDSSYRYTNGTQGTAWLIQ---ENPFKGYGYSNEVYDSI 301  
Se\_NP\_462613 LAIIGALVITQ---HNKFPDPEHLLY---KLQNTDSSYRYTNGTQGTAWLIQ---ENPIKGYGYNVDVYDGV 301  
Ec\_AAC69661 (R3) AIIALSIVIFTH---KEMTAKLY---KLQNTSSYRYANGTQGSALDLIL---ENPVIKGYGYNVAYDKV 209  
Xb\_YP\_003470214 LLLLAGSIIHWS---AVSNPATKLLHL---KLQNTDSSYRYANGTQGSASLIM---ENPVRKGYGYNVYHVV 306  
Pm\_CAR46213 VALFFGVTLQP---NNQFINAKLKH---KLSQNTSGLRFDGCTQGSALDLIL---AQPIKGYGYNQLYHNV 303  
Pr\_EFE51464 LSLVLSISIKL---IYPETSKLFLY---KLEQTDSSHRYTNGTQGTAFELIL---ENPIKGYGVDIEYHEK 297  
Pa\_AAG08384 LAGALLGYILY---PEVITQGGASRPEIWDALRQIS---EHPWLGHGYDHFMRIVL 293  
Kp\_BAH65745 VLVALLLVMTVPDMLLARFEEL---GTQSGRLRSIWHHTLSEMA---SQPWLGRGFSY--ELDF 263  
Vc\_AAL77364 CLLPFLQKTDGFIAGNRLESI---TNTSDASNISRITMWQSGLEFFKFKFNHQPEDIILGSLLLH--FNDE 295  
Lb\_YP\_797859 MLLLVLCIVLSFT---QVQKQITDPLFG---KEKHTDSG---RTFIWSDTFPLIR---DNFFAGVCGPN--YDRE 323

Vc\_AAL76923 NIELFK---EKVDEWSTVPRGHASQYFEAIASN---ILGILAI FAMILILPFGVFLNDYRKTGSP---ISQTGYLFA 359  
Te\_ADU91200 MKWQFL---DGHISQ---KVYKRRHFNINELYNEFVKRIFGFLALISLVISFAYFFKNARSNYSSSEVKLPAGIGAIFV 373  
Hp\_EGC72795 KKDLAD---KDVVTK---ASISFLHLNMQFIDELAKRIGLGGIAILSIFIVPLHLFYRVKVVQGNKRIKIFISILGIHV 374  
As\_YP\_001140043 KQEQVA---RGLVPLALNAALAHASQYMQNLVIRGGIGFVVLVAFPLFLPLWLSMKMGDAAC-----VLIP 361  
Vc\_AAL77359 ISKMTN---PGAAMQPHLNQYLDLFLARYGIVGTVMVFLFCLALFLNLNSGFEYIGN---PLVNSML 357  
Pd\_ZP\_06156631 LDLELYH---QGRIEKLYQYQPAHYHNQYLDLRFVKNQVIGLILLALLLCPITQIKKLNNTKQ---YILLGII 353  
Br\_CBW75858 MMHFPK---YNHLVSDPHMLAHNEILSMLAEAGTVGLVCLLLL YGGPLRYFWKYRRSDPT--ITNAAYMGLIMV 373  
Ec\_AAC69671 IHELEE---KEPRLSGALPYVDSHLNLDLITLSTRCPGVVLTILAFSAIILYALRTAKE-----PYLILL 373  
Ec\_AAC69682 IKALSA---ENNIYSGALLFLDVHMNEIVESLSTRKIGLLVLIMFYVAMIYYCIREKK-----YILLVFP 378  
Pa\_CAG73082 IIAQAE---QKPSLAGAVEYLVNHLNNEVIDAFSLKLPGAILLILLVYSLFYFSFFVLSR---HLSAALL 388  
Cy\_ZP\_06355745. IQLRAI---QDNSLQGALEFIDVHLNNEIIDIYSLKIPGVVVLVLLYSAMFLRAYTKRS-----PLLFMIS 384  
Ec\_AAB18599 (K12) MNLLVA---EHNRLRGALEFSNVHLNNEIEAGSLKGLMGIFSTLFLYFSLFYIAYKKRA-----LGLLILT 379  
Ea\_CBA19033 AMRIIQ---ADPQLYNAKRYLTVHMNEIETWSLKGIVGWVLLAFYGSLLTVLAFRLSRN-----AMLFGLT 369  
Ec\_AAC69648 YNKRIV---DFPSWKFRQSIGFENVVLSIWFAGLAGLALLLYYGSIIKETANATFKTVVV---TPYNGQLLLF 371  
Se\_AAS22256 YNKRIV---DYPTWTFKESIGFNTILYIWFSAIGLGLASLALYGAIIRETASSTFKKVEI---SPYNAHLLL 370  
Se\_NP\_462613 YNKRIV---DYPTWTFKESIGFNTILYIWFSAIGLGLASLALYGAIIRETASSTLRKVEI---SPYNAHLLL 370  
Ec\_AAC69661 (R3) YNKRVI---DYPEWTFRQSIGFNFALFIWFGTGLLGLVSLMMLYCAILKECIKNGVKNKYR---SPYNAYYYIL 368  
Xb\_YP\_003470214 YNSRVA---DYPDWTFRTSIFGNVFLSLWFAGLFLGLITLLMLTSLTFTGSGIIRQHSGI---IRQAGLILL 374  
Pm\_CAR46213 YNQVVK---QHKNVWFKKSIGFNVFLAFWFAAGLGLISLIFYCASFIAQGIQIRKNQGI---TRQAALLV 371  
Pr\_EFE51464 YNSVVK---HYPEWVARYSIGFNIWYIWFAGIAGLAI FSAVFLSMCYASMRKIGKNSDE---PEIYFAFTALL 367  
Pa\_AAG08384 SNGMLL---ADPNIELGVLFAAGIIGLLLVVAIYALAFGFSWKNRKSIPA-----VLLA 344  
Kp\_BAH65745 IN---YSGEHITTTTSSVYMGALLKKGIVGLLLLLAIACGLWQAWRRKRTDSRY-----S 315  
Vc\_AAL77364 FYKFMSENYDIEEIKLKTMMNFSDSINSYIDMLNKLIFLFLSLSYISLLTSIILHLLKEAPTPTWQ-----AGISLI 368  
Lb\_YP\_797859 IEKSRKEHSEKYRELYFYFETQRGHANDYFHLFAVFPFGIFLFLSLGTELYRRLITTKLPEYHS---LYFFGL 396

\* \*

**Fig. S5.** Multiple sequence alignment analysis of WaaL homologues.
